# Supplementary material
Source: PubMed Central journal article supplement (PMC4980438)
Supplement: JZUSB17-0597-TS.pdf [file JZUSB17-0597-TS.pdf]

Supplementary Materials:

## Probiotic properties of lactic acid bacteria isolated from traditionally fermented Xinjiang cheese

Ramila AZAT, Yan LIU, Wei LI, Abdurihim KAYIR,  
Ding-bo LIN, Wen-wen ZHOU, Xiao-dong ZHENG

**Table S1 Physiological and biochemical characteristics of six strains**

| Strains                   | H4                      | K4-8                    | K4-9                    | R4                        | R5                      | S4                        |
|---------------------------|-------------------------|-------------------------|-------------------------|---------------------------|-------------------------|---------------------------|
| Cell morphology           | Coccus                  | Coccus                  | Coccus                  | Rod                       | Coccus                  | Rod                       |
| Surface appearance        | Off-white, smooth moist | Off-white, smooth moist | Off-white, smooth moist | Milky white, smooth moist | Off-white, smooth moist | Milky white, smooth moist |
| Gram staining             | +                       | +                       | +                       | +                         | +                       | +                         |
| Gas from glucose          | +                       | +                       | -                       | +                         | -                       | -                         |
| Catalase test             | -                       | -                       | -                       | -                         | -                       | -                         |
| Milk curd test            | +                       | -                       | -                       | +                         | +                       | +                         |
| Growth at:                |                         |                         |                         |                           |                         |                           |
| 45 °C                     | w                       | -                       | w                       | +                         | -                       | +                         |
| 60 °C                     | w                       | -                       | -                       | w                         | w                       | -                         |
| pH 3.0                    | +                       | +                       | +                       | +                         | +                       | +                         |
| pH 9.0                    | -                       | -                       | -                       | +                         | -                       | +                         |
| Hydrolysis of:            |                         |                         |                         |                           |                         |                           |
| Arginine                  | +                       | +                       | -                       | -                         | +                       | -                         |
| Aesculin                  | +                       | +                       | -                       | +                         | +                       | -                         |
| Carbohydrate fermentation |                         |                         |                         |                           |                         |                           |
| Glucose                   | +                       | +                       | +                       | +                         | +                       | +                         |
| Sucrose                   | -                       | +                       | +                       | +                         | -                       | +                         |
| Fructose                  | +                       | +                       | +                       | +                         | +                       | -                         |
| Galactose                 | +                       | +                       | +                       | +                         | +                       | -                         |
| Sodium gluconate          | -                       | -                       | -                       | -                         | -                       | -                         |
| Lactose                   | -                       | +                       | +                       | -                         | +                       | -                         |
| Mannitol                  | +                       | -                       | -                       | -                         | +                       | -                         |
| Preliminary results       | <i>Enterococcus</i>     | <i>Enterococcus</i>     | <i>Enterococcus</i>     | <i>Lactobacillus</i>      | <i>Enterococcus</i>     | <i>Lactobacillus</i>      |

+ = positive; - = negative; w = weak

**Table S2 Acidifying activity of six strains of lactic acid bacteria isolated from Xinjiang cheese**

| Strains                 | Titratable acidity (g/100 ml) <sup>g</sup> |                      |                      |
|-------------------------|--------------------------------------------|----------------------|----------------------|
|                         | Incubation time 6 h                        | Incubation time 12 h | Incubation time 24 h |
| <i>L. rhamnosus</i> R4  | 0.40 <sup>cd</sup>                         | 0.69 <sup>b</sup>    | 0.86 <sup>a</sup>    |
| <i>L. helveticus</i> S4 | 0.41 <sup>bc</sup>                         | 0.72 <sup>a</sup>    | 0.78 <sup>c</sup>    |
| <i>E. hirae</i> H4      | 0.44 <sup>a</sup>                          | 0.68 <sup>b</sup>    | 0.83 <sup>b</sup>    |
| <i>E. hirae</i> R5      | 0.44 <sup>a</sup>                          | 0.60 <sup>cd</sup>   | 0.74 <sup>de</sup>   |
| <i>E. hirae</i> K4-8    | 0.37 <sup>de</sup>                         | 0.58 <sup>de</sup>   | 0.82 <sup>b</sup>    |
| <i>E. hirae</i> K4-9    | 0.22 <sup>f</sup>                          | 0.59 <sup>ef</sup>   | 0.73 <sup>ef</sup>   |

Presented values are means of duplicate determinations; Mean values within the same column followed by different superscript letters differ significantly ( $P<0.05$ ); <sup>g</sup> Titratable acidity expressed as g/100 ml lactic acid

**Table S3 Diacetyl-producing abilities of six strains of lactic acid bacteria isolated from Xinjiang cheese**

| Strains                 | Fermentation temperature (°C) | Cold storage time (h) | Diacetyl production (µg/ml) |
|-------------------------|-------------------------------|-----------------------|-----------------------------|
| <i>L. rhamnosus</i> R4  | 37                            | 48                    | 1.76 <sup>a</sup>           |
| <i>L. helveticus</i> S4 | 37                            | 36                    | 1.61 <sup>b</sup>           |
| <i>E. hirae</i> H4      | 37                            | 36                    | 1.39 <sup>c</sup>           |
| <i>E. hirae</i> R5      | 37                            | 24                    | 1.20 <sup>d</sup>           |
| <i>E. hirae</i> K4-8    | 37                            | 24                    | 0.72 <sup>e</sup>           |
| <i>E. hirae</i> K4-9    | 37                            | 12                    | 0.68 <sup>e</sup>           |

Presented values are means of duplicate determinations; Mean values within the same column followed by different superscript letters differ significantly ( $P<0.05$ )

**Table S4 Autolysis activities of six strains of lactic acid bacteria isolated from Xinjiang cheese**

| Strains                 | Autolysis (%)            |                         |                         |
|-------------------------|--------------------------|-------------------------|-------------------------|
|                         | Incubation time 8 h      | Incubation time 24 h    | Incubation time 48 h    |
| <i>L. rhamnosus</i> R4  | 12.70±0.50 <sup>a</sup>  | 22.30±1.20 <sup>a</sup> | 56.05±0.80 <sup>a</sup> |
| <i>L. helveticus</i> S4 | 11.80±0.41 <sup>b</sup>  | 20.5±0.60 <sup>b</sup>  | 45.42±1.21 <sup>a</sup> |
| <i>E. hirae</i> H4      | 10.90±0.60 <sup>cd</sup> | 15.30±0.80 <sup>c</sup> | 29.38±0.02 <sup>b</sup> |
| <i>E. hirae</i> R5      | 10.0±0.50 <sup>cd</sup>  | 14.81±1.30 <sup>c</sup> | 25.08±0.97 <sup>c</sup> |
| <i>E. hirae</i> K4-8    | 3.51±0.40 <sup>e</sup>   | 8.72±0.50 <sup>d</sup>  | 13.56±0.05 <sup>d</sup> |
| <i>E. hirae</i> K4-9    | 3.32±0.37 <sup>f</sup>   | 5.03±0.60 <sup>e</sup>  | 9.65±0.81 <sup>e</sup>  |

<sup>a-f</sup> Presented values are means of duplicate determinations; ± indicates standard deviation from the mean. Mean values (± standard deviation) within the same column followed by different superscript letters differ significantly ( $P < 0.05$ )
